# Supplementary material for: Assessment of M6 monazite as a potential reference material for in situ microbeam analyses of U–Th–Pb geochronology and O–Nd isotopes
Source: Royal Society of Chemistry journal article supplement (doi:10.1039/d4ja00246f), 2024-01-01
Supplement: d4ja00246f2.pdf [file d4ja00246f2.pdf]

Figure S1:  $\ln(^{206}\text{Pb}/^{238}\text{U})$  vs.  $\ln(^{238}\text{U}^{16}\text{O}_2/^{238}\text{U})$  for both the M6 monazite and the reference monazite USGS 44069 in SIMS U-Th-Pb sessions 1.
