# Supplementary figures and images for: Assessment of M6 monazite as a potential reference material for in situ microbeam analyses of U–Th–Pb geochronology and O–Nd isotopes
Source: Royal Society of Chemistry journal article supplement (doi:10.1039/d4ja00246f), 2024-01-01

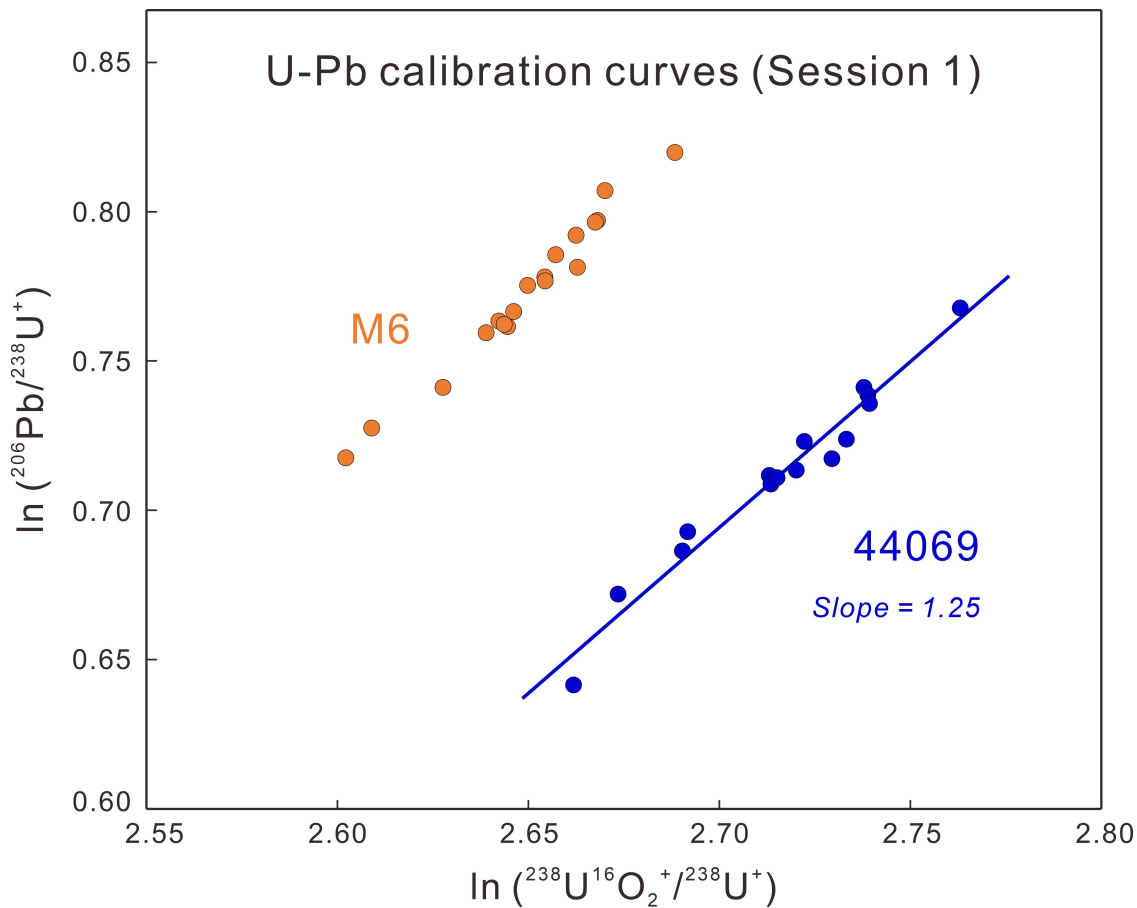

Supplement: d4ja00246f1.pdf [file d4ja00246f1.pdf]
